# Supplementary material for: Systems analysis reveals a transcriptional reversal of the mesenchymal phenotype induced by SNAIL-inhibitor GN-25
Source: Springer Nature journal article supplement (doi:10.1186/1752-0509-7-85), 2013-01-01

A

1 2 3 4  
 HMLE-SNAI1 HMLE-SNAI1 HMLE-SNAI1 HMLE-SNAI1

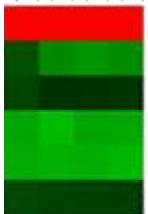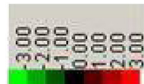

B

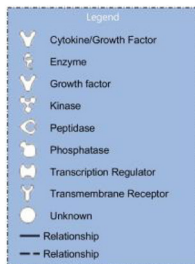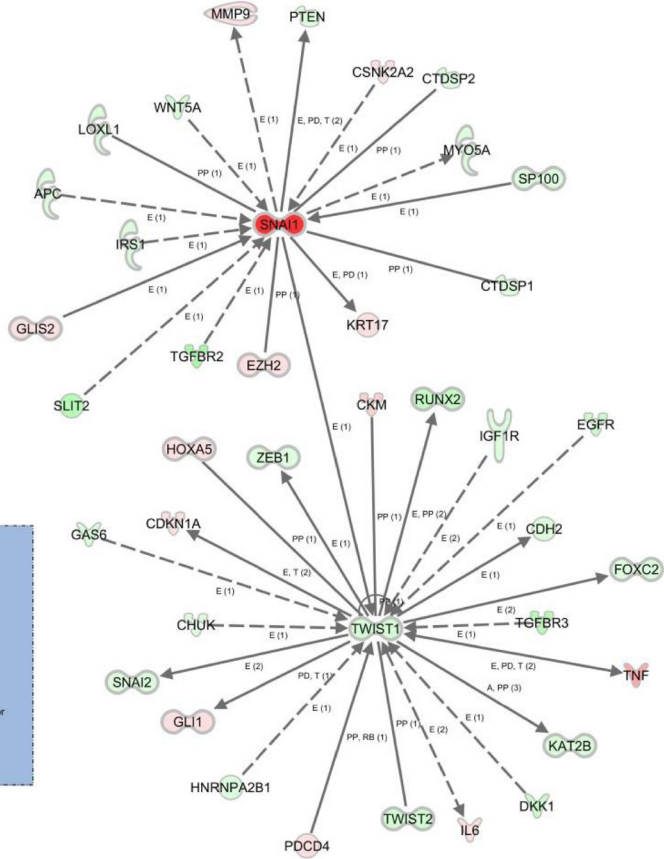

Supplement: 12918_2013_1141_MOESM7_ESM.pdf [file 12918_2013_1141_MOESM7_ESM.pdf]
